# Supplementary material
Source: publisher site journal article supplement (https://www.dovepress.com/article/supplementary_file/584881/584881%20Revised%20Supplementary%20Materials.docx)
Supplement: Supplementary file 1 [file 584881%20Revised%20Supplementary%20Materials.docx]

**Supplementary material**

**Supplementary Table 1: List of codes for specific diagnoses labs and pharmacological treatment**

| SFD SMALL FOR DATE (GESTATIONAL AGE) | 764.0 |
| --- | --- |
|  | Y18240 |
| IUGR INTRA UTERINE GROWTH RETARDATION | 764.9 |
| LGA | 766 |
|  | 766.1 |
|  | Y18248 |
|  | Y18207 |
| HYPOGLYCEMIA NEONATAL | 775.6 |
|  | Y18330 |
| FAILURE TO THRIVE | Y18551 |
| Jaundice | 774.2 |
|  | 774.6 |
| HYPERBILIRUBINEMIA | Y11856 |
| IMPAIRED FASTING GLUCOSE (100-125) | Y21904 |
| GLUCOSE INTOLERANCE | Y22706 |
| GLUCOSE TOLERNACE ABNORMAL IN PREGNANCY | Y20715 |
| ABNORMAL GLUCOSE TOLERANCE TEST | 790.2 |
| GLUCOSE TOLERANCE ABNORMAL IN PREGNANCY | 648.8 |
|  |  |
| DIABETES MELLITUS IN PREGNANCY | 648 |
| prediabetes | Y23606 |
| diabetes mellitus uns | Y11527 |
| PREECLAMPSIA | 642.4 |
|  | 642.5 |
|  | Y15991 |
|  | Y15992 |
|  | Y15996 |
|  | Y15997 |
|  |  |

| Glucose (B) | 2947 |
| --- | --- |
| Glucose Challenge Test 1h | 29570 |
| GTT-Glucose 0' | 29470 |
| GTT-Glucose 60' | 29473 |
| GTT-Glucose 120' | 29475 |
| GTT-Glucose 180' | 29477 |
| Glucose 120' (75g) | 29521 |
| protein (U)/24 hr | 41800 |
|  | 50223 |

| levemir penfill | 20875 |
| --- | --- |
| LEVEMIR FLEXPEN | 61840 |
|  |  |
|  |  |
| NOVORAPID | 3646 |
| NOVORAPID PENFILL | 20874 |
| NOVORAPID VIAL | 24677 |
| NOVORAPID PENFILL | 24678 |
| NOVORAPID FLEXPEN | 65257 |
| GLIBETIC, gluben, | 130 |
| 2103 |
| 7940 |
| 7941 |
| glucophage, apophage, metformin, glufor, glucomin,metformin | 7797 |
| 9615 |
| 9616 |
| 11711 |
| 12493 |
| 18821 |
| 34013 |
| 47621 |
| 15539 |

**Supplementary Table 2: Neonatal follow-up during the first year of life among patients with hyperglycemia, hypoglycemia and normoglycemia per trimester of diagnosis**

| Parameters | First trimester  N=713 | | | | Second trimester  N=24,326 | | | | Third trimester  N=14,267 | | | | |
| --- | --- | --- | --- | --- | --- | --- | --- | --- | --- | --- | --- | --- | --- |
| HYPER  N=254 | HYPO  N=210 | Normal N=249 | p-value | HYPER  N=5055 | HYPO  N=11218 | Normal N=8053 | p-value | HYPER  N=3234 | HYPO  N=4634 | Normal N=6399 | p-value |
| Neonatal weight at first visit after birth | 5.5±2.3,  5.1 [3.3-7.2] | 6.0±8.3,  4.3 [3.3-6.8] | 5.0±2.2,  4.2 [3.3-6.2] | 0.437 | 5.4±5.0,  4.4 [3.4-7.0] | 5.3±5.3,  4.4 [3.4-7.0] | 5.5±5.0,  4.5 [3.5-7.3] | 0.021 | 5.8±5.3,  4.7 [3.6-7.2] | 5.7±3.7,  4.8 [3.8-7.4] | 6.1±11.5,  4.9 [3.8-7.5] | 0.095 |
| Delta between first weight after delivery-neonatal weight | 2.3±2.3,  1.8 [0.1-4.1] | 2.7±8.3,  0.8 [0.1-3.6] | 1.8±2.1,  0.7 [0.0-3.1] | 0.264 | 2.3±5.0,  1.2 [0.2-3.9] | 2.2±5.3,  1.2 [0.2-3.8] | 2.3±4.9,  1.3 [0.1-4.1] | 0.185 | 2.4±5.2,  1.3 [0.2-3.9] | 2.3±3.7,  1.3 [0.3-4.0] | 2.6±11.5,  1.4 [0.2-4.1] | 0.425 |
| Number of weights during first year | 1.5±3.2,  0.0 [0.0-1.0] | 2.0±3.8,  0.0 [0.0-2.0] | 1.4±3.5,  0.0 [0.0-1.0] | 0.093 | 1.8±3.7,  0.0 [0.0-2.0] | 2.0±3.6,  0.0 [0.0-2.0] | 1.7±3.5,  0.0 [0.0-2.0] | <0.001 | 1.7±3.4,  0.0 [0.0-2.0] | 2.0±3.5,  0.0 [0.0-2.0] | 1.8±3.4,  0.0 [0.0-2.0] | <0.001 |
| Number of ER admission during first year of life | 0.1±0.5,  0.0 [0.0-0.0] | 0.3±0.6,  0.0 [0.0-0.0] | 0.1±0.4,  0.0 [0.0-0.0] | 0.044 | 0.2±0.6,  0.0 [0.0-0.0] | 0.2±0.6,  0.0 [0.0-0.0] | 0.2±0.6,  0.0 [0.0-0.0] | <0.001 | 0.2±0.6,  0.0 [0.0-0.0] | 0.3±0.6,  0.0 [0.0-0.0] | 0.2±0.6,  0.0 [0.0-0.0] | <0.001 |

Continuous variables are reported as Mean ±SD and Median [Q1-Q3]

**Supplementary Table 3: Utilization of obstetric services among patients with hyperglycemia, hypoglycemia and normoglycemia per trimester of diagnosis**

| Parameters | First trimester  N=713 | | | | Second trimester  N=24,326 | | | | Third trimester  N=14,267 | | | | |
| --- | --- | --- | --- | --- | --- | --- | --- | --- | --- | --- | --- | --- | --- |
| HYPER  N=254 | HYPO  N=210 | Normal N=249 | p-value | HYPER  N=5055 | HYPO  N=11218 | Normal N=8053 | p-value | HYPER  N=3234 | HYPO  N=4634 | Normal N=6399 | p-value |
| Gynecology visits | 21.0±8.6,  20.0 [15.0-26.0] | 17.4±7.0,  16.0 [12.0-22.0] | 15.8±7.4,  15.0 [11.0-19.0] | <0.001 | 17.1±7.6,  16.0 [12.0-21.0] | 13.5±6.6,  12.0 [9.0-17.0] | 14.4±6.7,  13.0 [10.0-18.0] | <0.001 | 14.2±7.1,  13.0 [9.0-18.0] | 12.8±6.6,  12.0 [8.0-16.0] | 12.9±6.5,  12.0 [8.0-16.0] | <0.001 |
| ultrasound examinations | 1.3±3.4,  0.0 [0.0-1.0] | 0.6±2.2,  0.0 [0.0-1.0] | 0.5±2.0,  0.0 [0.0-0.0] | <0.001 | 1.1±2.7,  0.0 [0.0-1.0] | 0.6±1.8,  0.0 [0.0-0.0] | 0.7±1.9,  0.0 [0.0-0.0] | <0.001 | 0.9±2.3,  0.0 [0.0-1.0] | 0.7±1.7,  0.0 [0.0-1.0] | 0.7±1.7,  0.0 [0.0-1.0] | 0.100 |
| ER admissions | 2.3±2.4,  2.0 [0.0-3.3] | 2.5±2.9,  1.0 [1.0-4.0] | 2.6±3.0,  2.0 [1.0-3.0] | 0.807 | 2.2±2.8,  1.0 [0.0-3.0] | 1.7±2.4,  1.0 [0.0-2.0] | 2.2±2.9,  1.0 [0.0-3.0] | <0.001 | 1.9±2.5,  1.0 [0.0-3.0] | 1.7±2.4,  1.0 [0.0-2.0] | 1.8±2.5,  1.0 [0.0-3.0] | <0.001 |
| Hospitalizations | 0.5±0.9,  0.0 [0.0-1.0] | 0.4±0.7,  0.0 [0.0-1.0] | 0.3±0.7,  0.0 [0.0-5.0] | 0.414 | 0.4±0.8,  0.0 [0.0-1.0] | 0.3±0.7,  0.0 [0.0-0.0] | 0.3±0.7,  0.0 [0.0-0.0] | <0.001 | 0.3±0.7,  0.0 [0.0-0.0] | 0.3±0.6,  0.0 [0.0-0.0] | 0.3±0.7,  0.0 [0.0-0.0] | <0.001 |

Continuous variables are reported as Mean ±SD and Median [Q1-Q3]
